# Supplementary material for: Dual Role of Vitamin C-Encapsulated Liposomal Berberine in Effective Colon Anticancer Immunotherapy
Source: MDPI journal article supplement (doi:10.3390/ph17010005), 2023-12-20
Supplement: s1 [file s1]

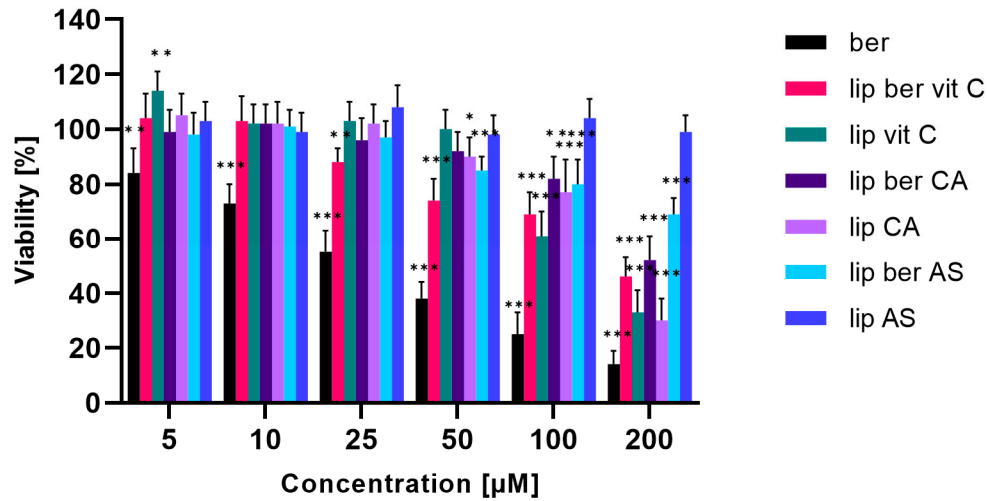

**Figure S1.** Cell viability of LS180 cell line after 24 hours administration of berberine-loaded liposomes, blank liposomes, and free berberine. Viability of untreated cells (control) was considered to be 100% of cell viability. Data represent the mean  $\pm$  SD of three independent biological replicates. Statistical significance analysis of data differences was performed using the GraphPad Prism software (version 9, GraphPad Software, San Diego, CA, USA). Statistical significance was determined using a one-way ANOVA (Dunnett's modification) test. \*\*\*  $p < 0.001$ ; \*\*  $p < 0.002$ ; \*  $p < 0.033$ .

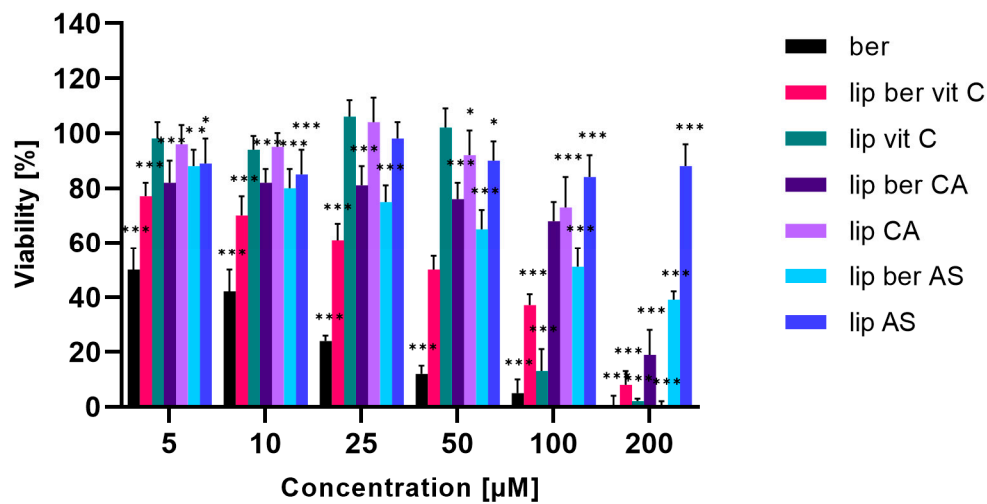

**Figure S2.** Cell viability of LS180 cell line after 48 hours administration of berberine-loaded liposomes, blank liposomes, and free berberine. Viability of untreated cells (control) was considered to be 100% of cell viability. Data represent the mean  $\pm$  SD of three independent biological replicates. Statistical significance analysis of data differences was performed using the GraphPad Prism software (version 9, GraphPad Software, San Diego, CA, USA). Statistical significance was determined using a one-way ANOVA (Dunnett's modification) test. \*\*\*  $p < 0.001$ ; \*\*  $p < 0.002$ ; \*  $p < 0.033$ .

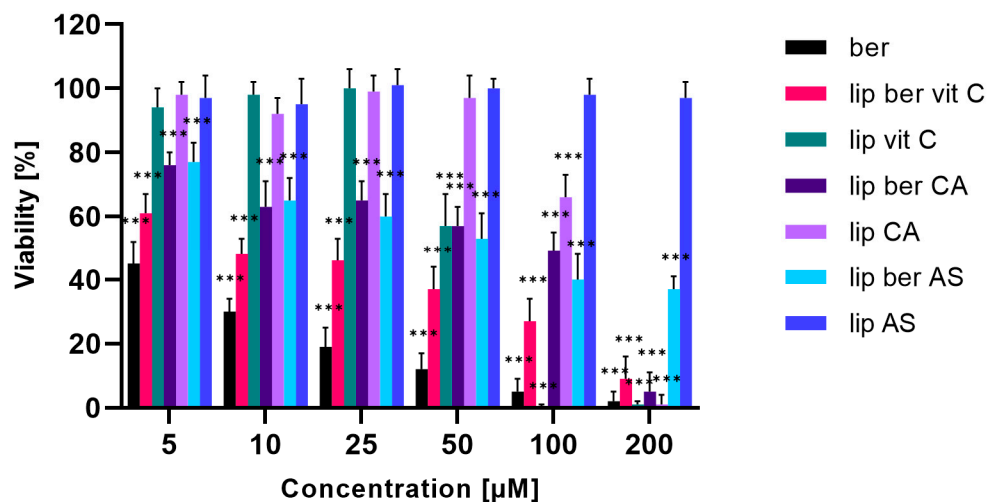

**Figure S3.** Cell viability of LS180 cell line after 72 hours administration of berberine-loaded liposomes, blank liposomes, and free berberine. Viability of untreated cells (control) was considered to be 100% of cell viability. Data represent the mean  $\pm$  SD of three independent biological replicates. Statistical significance analysis of data differences was performed using the GraphPad Prism software (version 9, GraphPad Software, San Diego, CA, USA). Statistical significance was determined using a one-way ANOVA (Dunnett's modification) test. \*\*\*  $p < 0.001$ ; \*\*  $p < 0.002$ ; \*  $p < 0.033$ .

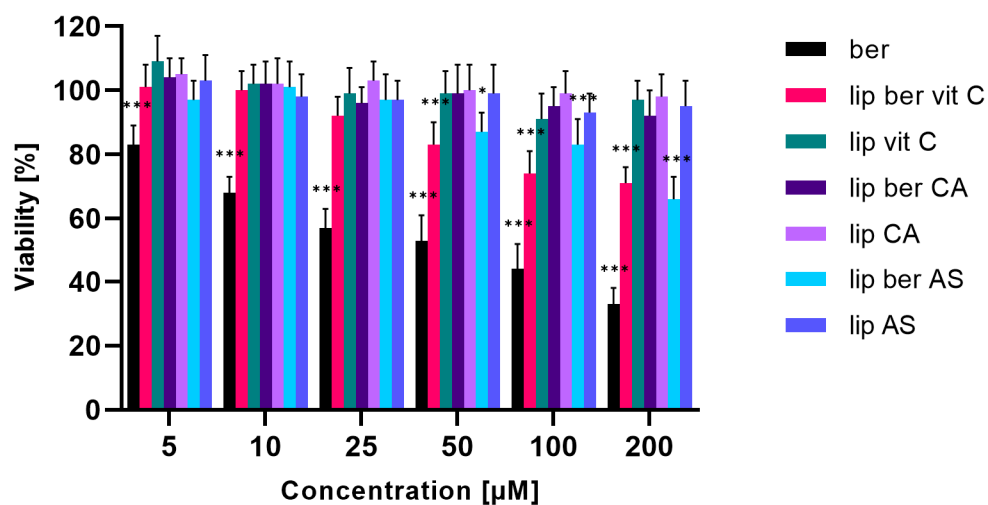

**Figure S4.** Cell viability of SW620 cell line after 24 hours administration of berberine-loaded liposomes, blank liposomes, and free berberine. Viability of untreated cells (control) was considered to be 100% of cell viability. Data represent the mean  $\pm$  SD of three independent biological replicates. Statistical significance analysis of data differences was performed using the GraphPad Prism software (version 9, GraphPad Software, San Diego, CA, USA). Statistical significance was determined using a one-way ANOVA (Dunnett's modification) test. \*\*\*  $p < 0.001$ ; \*\*  $p < 0.002$ ; \*  $p < 0.033$ .

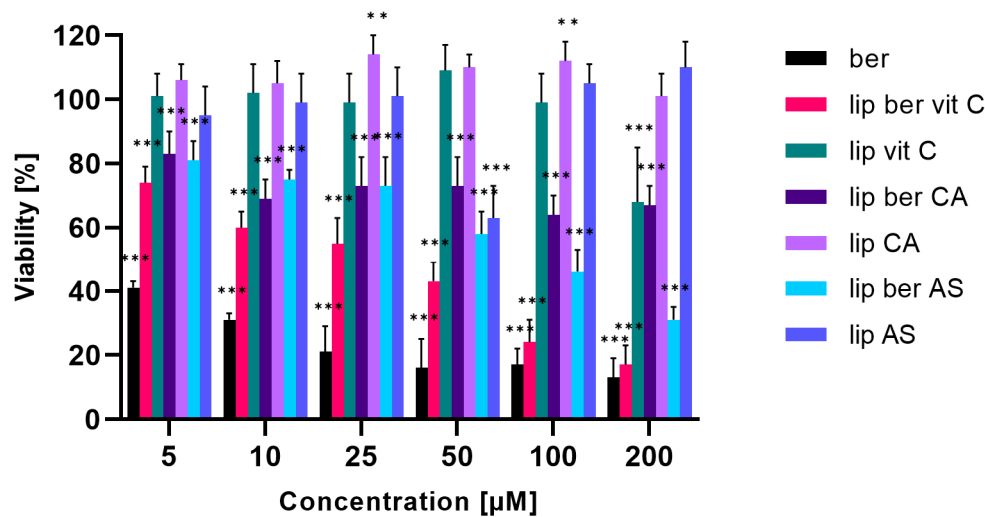

**Figure S5.** Cell viability of SW620 cell line after 48 hours administration of berberine-loaded liposomes, blank liposomes, and free berberine. Viability of untreated cells (control) was considered to be 100% of cell viability. Data represent the mean  $\pm$  SD of three independent biological replicates. Statistical significance analysis of data differences was performed using the GraphPad Prism software (version 9, GraphPad Software, San Diego, CA, USA). Statistical significance was determined using a one-way ANOVA (Dunnett's modification) test. \*\*\*  $p < 0.001$ ; \*\*  $p < 0.002$ ; \*  $p < 0.033$ .

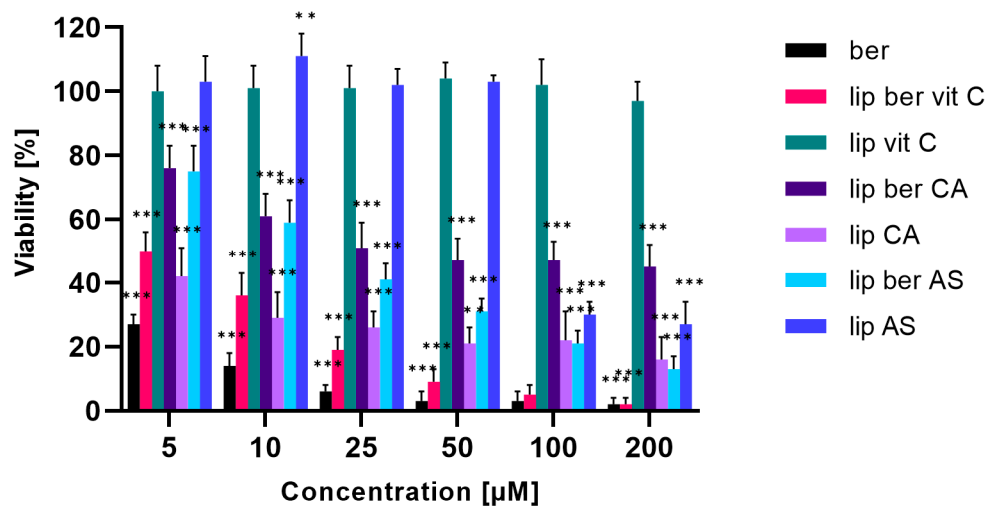

**Figure S6.** Cell viability of SW620 cell line after 72 hours administration of berberine-loaded liposomes, blank liposomes, and free berberine. Viability of untreated cells (control) was considered to be 100% of cell viability. Data represent the mean  $\pm$  SD of three independent biological replicates. Statistical significance analysis of data differences was performed using the GraphPad Prism software (version 9, GraphPad Software, San Diego, CA, USA). Statistical significance was determined using a one-way ANOVA (Dunnett's modification) test. \*\*\*  $p < 0.001$ ; \*\*  $p < 0.002$ ; \*  $p < 0.033$ .

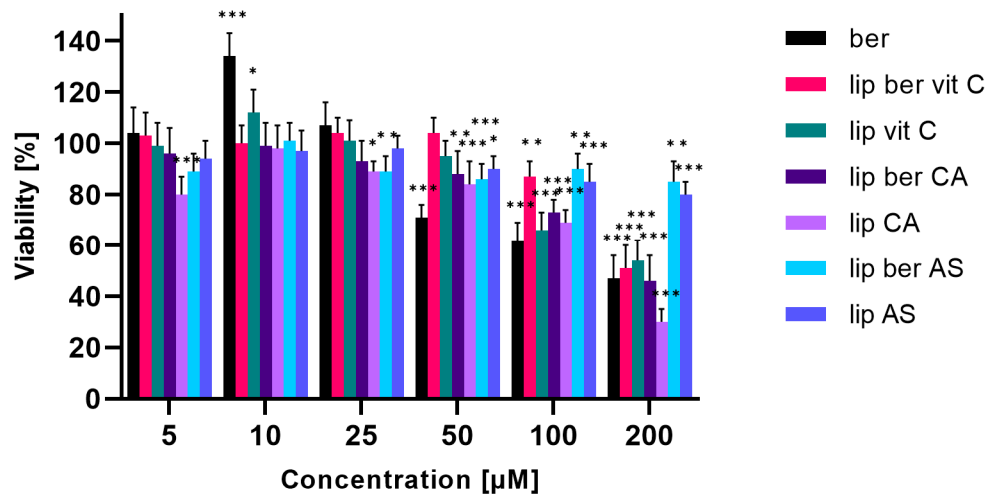

**Figure S7.** Cell viability of CCD112CoN cell line after 48 hours administration of berberine-loaded liposomes, blank liposomes, and free berberine. Viability of untreated cells (control) was considered to be 100% of cell viability. Data represent the mean  $\pm$  SD of three independent biological replicates. Statistical significance analysis of data differences was performed using the GraphPad Prism software (version 9, GraphPad Software, San Diego, CA, USA). Statistical significance was determined using a one-way ANOVA (Dunnett's modification) test. \*\*\*  $p < 0.001$ ; \*\*  $p < 0.002$ ; \*  $p < 0.033$ .

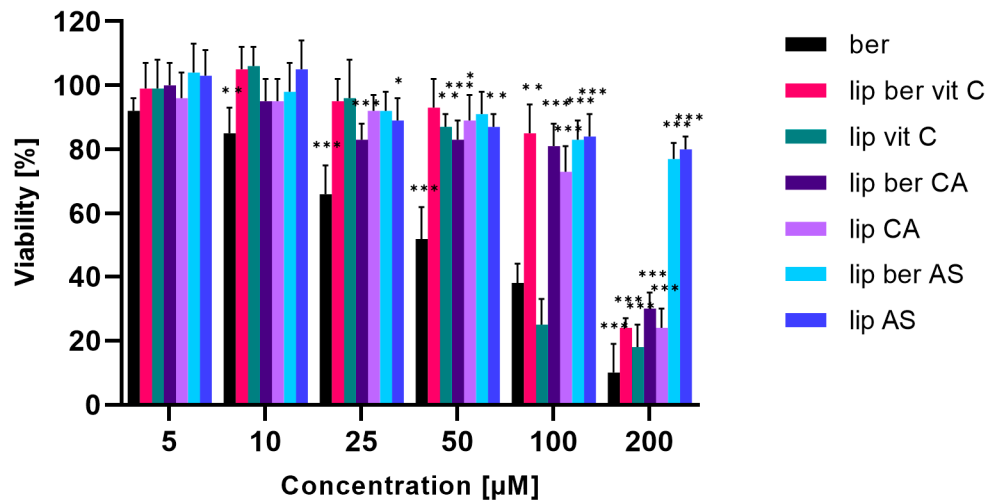

**Figure S8.** Cell viability of CCD112CoN cell line after 72 hours administration of berberine-loaded liposomes, blank liposomes, and free berberine. Viability of untreated cells (control) was considered to be 100% of cell viability. Data represent the mean  $\pm$  SD of three independent biological replicates. Statistical significance analysis of data differences was performed using the GraphPad Prism software (version 9, GraphPad Software, San Diego, CA, USA). Statistical significance was determined using a one-way ANOVA (Dunnett's modification) test. \*\*\*  $p < 0.001$ ; \*\*  $p < 0.002$ ; \*  $p < 0.033$ .

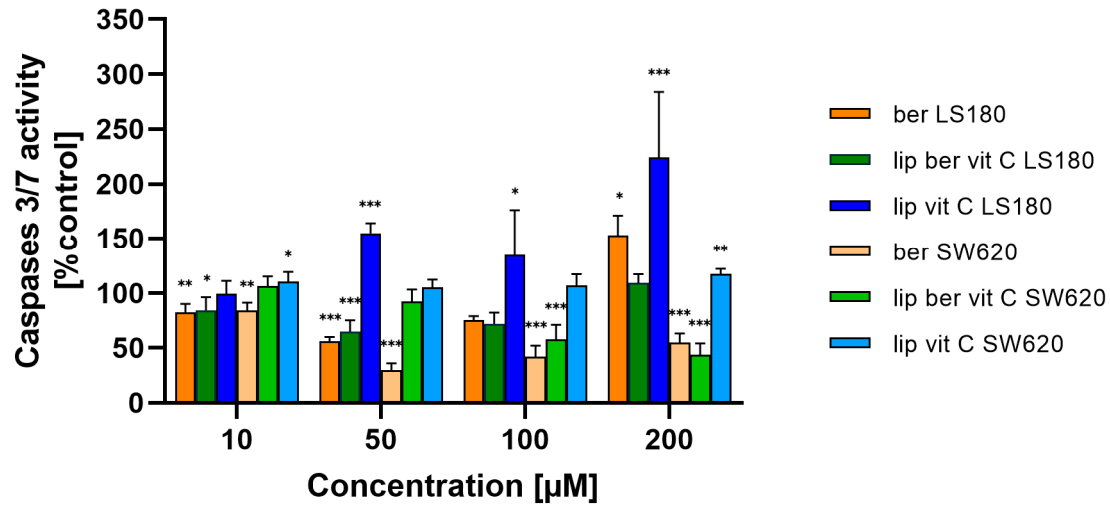

**Figure S9.** Caspases 3/7 changes in colon cancer cells after treatment of berberine loaded liposomes, blank-liposomes, and free berberine (10, 50, 100, or 200  $\mu$ M) for 24 h. Luminescence of untreated cells (control) was considered to be 100% of the caspases 3/7 level. Data represent the mean  $\pm$  SD of three independent biological replicates. Statistical significance was determined using a one-way ANOVA (Dunnett's modification) test. \*\*\*  $p < 0.001$ ; \*\*  $p < 0.002$ ; \*  $p < 0.033$ .

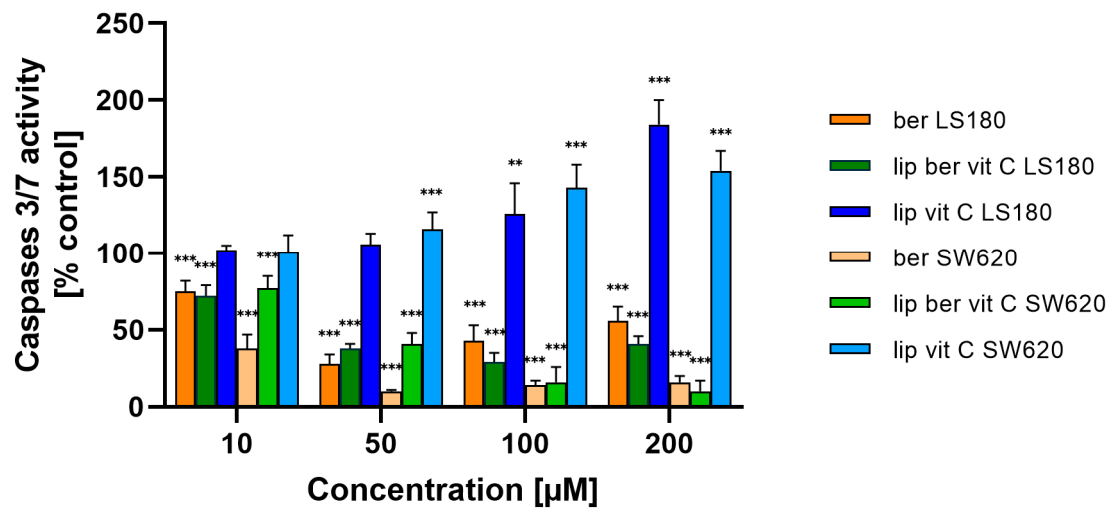

**Figure S10.** Caspases 3/7 changes in colon cancer cells after treatment of berberine loaded liposomes, blank-liposomes, and free berberine (10, 50, 100, or 200  $\mu$ M) for 48 h. Luminescence of untreated cells (control) was considered to be 100% of the caspases 3/7 level. Data represent the mean  $\pm$  SD of three independent biological replicates. Statistical significance was determined using a one-way ANOVA (Dunnett's modification) test. \*\*\*  $p < 0.001$ ; \*\*  $p < 0.002$ ; \*  $p < 0.033$ .

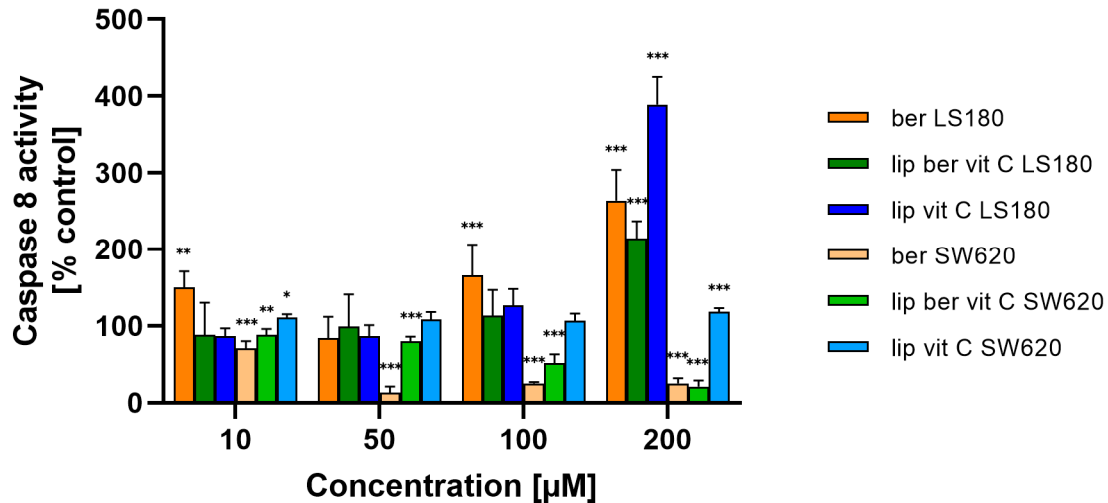

**Figure S11.** Caspase 8 changes in colon cancer cells after treatment of berberine loaded liposomes, blank-liposomes, and free berberine (10, 50, 100, or 200  $\mu$ M) for 24 h. Luminescence of untreated cells (control) was considered to be 100% of the caspase 8 level. Data represent the mean  $\pm$  SD of three independent biological replicates. Statistical significance was determined using a one-way ANOVA (Dunnett's modification) test. \*\*\*  $p < 0.001$ ; \*\*  $p < 0.002$ ; \*  $p < 0.033$ .

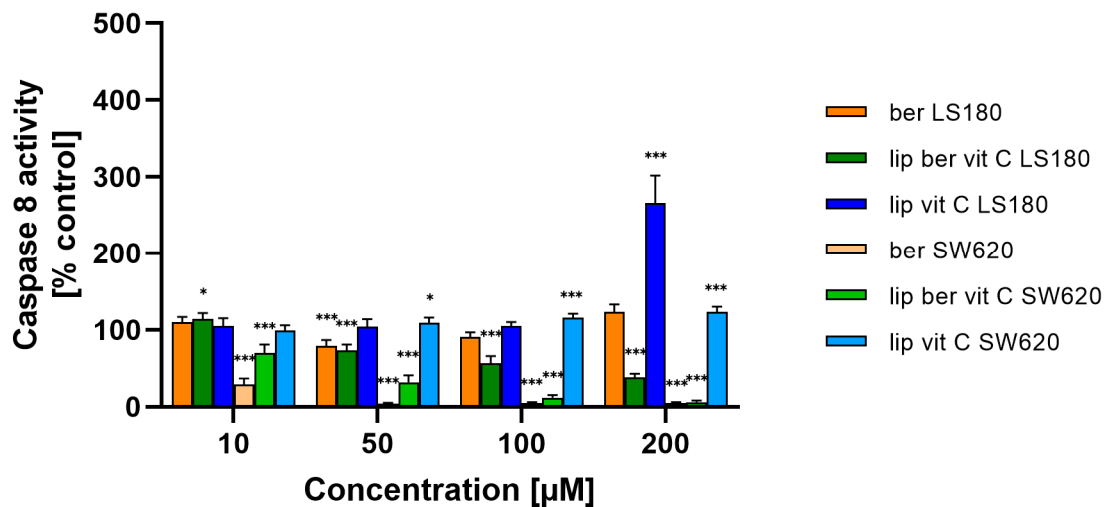

**Figure S12.** Caspase 8 changes in colon cancer cells after treatment of berberine loaded liposomes, blank-liposomes, and free berberine (10, 50, 100, or 200  $\mu$ M) for 48 h. Luminescence of untreated cells (control) was considered to be 100% of the caspase 8 level. Data represent the mean  $\pm$  SD of three independent biological replicates. Statistical significance was determined using a one-way ANOVA (Dunnett's modification) test. \*\*\*  $p < 0.001$ ; \*  $p < 0.033$ .

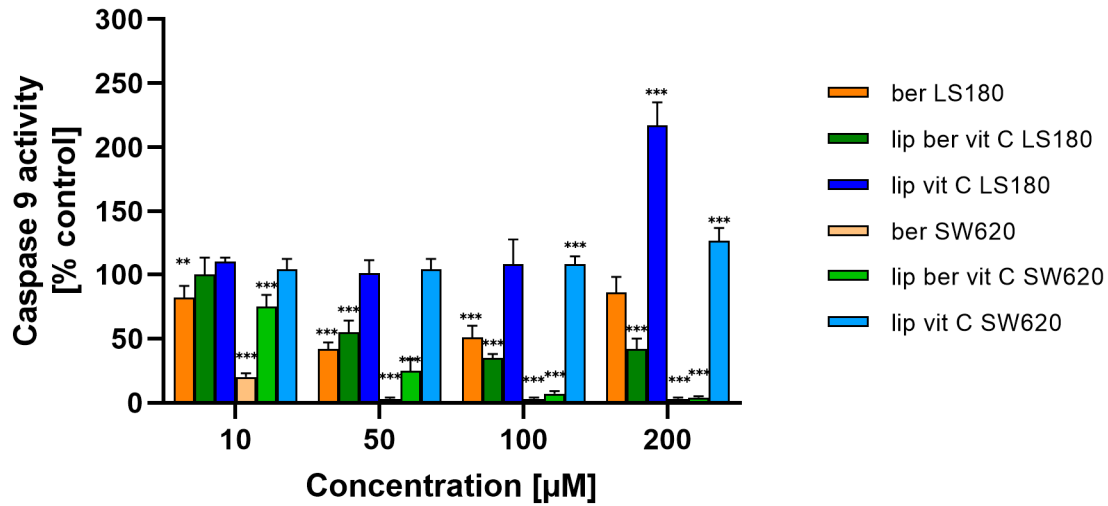

**Figure S13.** Caspase 9 changes in colon cancer cells after treatment of berberine loaded liposomes, blank-liposomes, and free berberine (10, 50, 100, or 200  $\mu$ M) for 24 h. Luminescence of untreated cells (control) was considered to be 100% of the caspase 9 level. Data represent the mean  $\pm$  SD of three independent biological replicates. Statistical significance was determined using a one-way ANOVA (Dunnett's modification) test. \*\*\*  $p < 0.001$ ; \*\*  $p < 0.002$ ; \*  $p < 0.033$ .

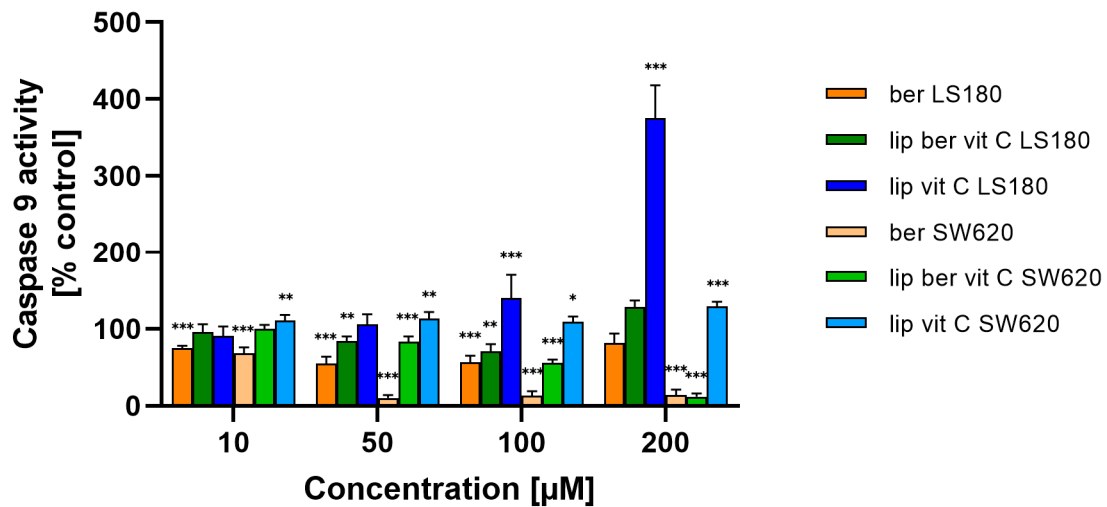

**Figure S14.** Caspase 9 changes in colon cancer cells after treatment of berberine loaded liposomes, blank-liposomes, and free berberine (10, 50, 100, or 200  $\mu$ M) for 48 h. Luminescence of untreated cells (control) was considered to be 100% of the caspase 9 level. Data represent the mean  $\pm$  SD of three independent biological replicates. Statistical significance was determined using a one-way ANOVA (Dunnett's modification) test. \*\*\*  $p < 0.001$ ; \*\*  $p < 0.002$ ; \*  $p < 0.033$ .

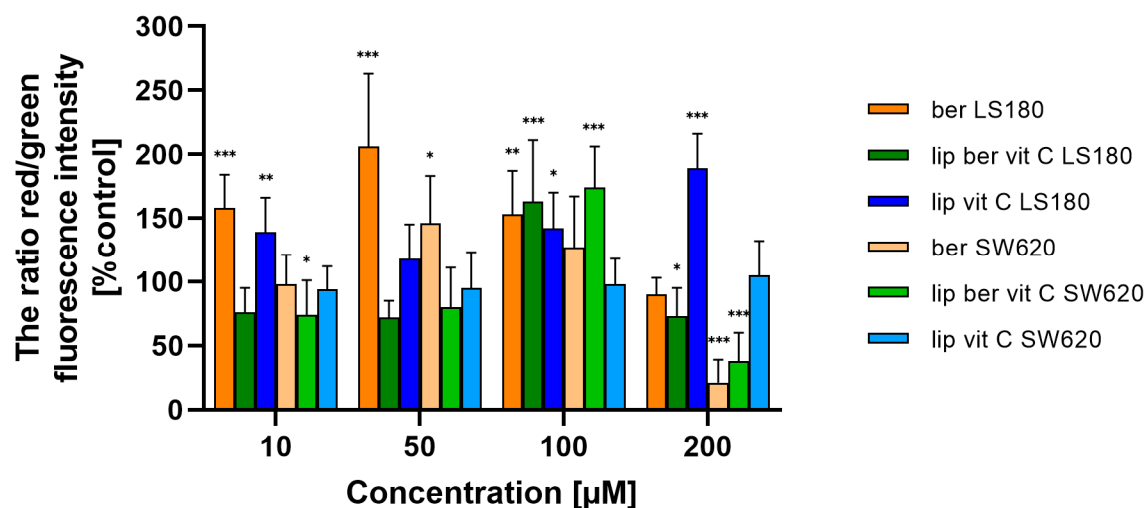

**Figure S15.**  $\Delta\psi_m$  changes in colon cancer cells after treatment of berberine loaded liposomes, blank-liposomes, and free berberine (10, 50, 100, or 200  $\mu\text{M}$ ) for 48 h.  $\Delta\psi_m$  was determined by fluorometry. The ratio of red to green fluorescence intensity of untreated cells (control) was considered to be 100% of the  $\Delta\psi_m$  level. Data represent the mean  $\pm$  SD of three independent biological replicates. Statistical significance was determined using a one-way ANOVA (Dunnett's modification) test. \*\*\*  $p < 0.001$ ; \*\*  $p < 0.002$ ; \*  $p < 0.033$ .

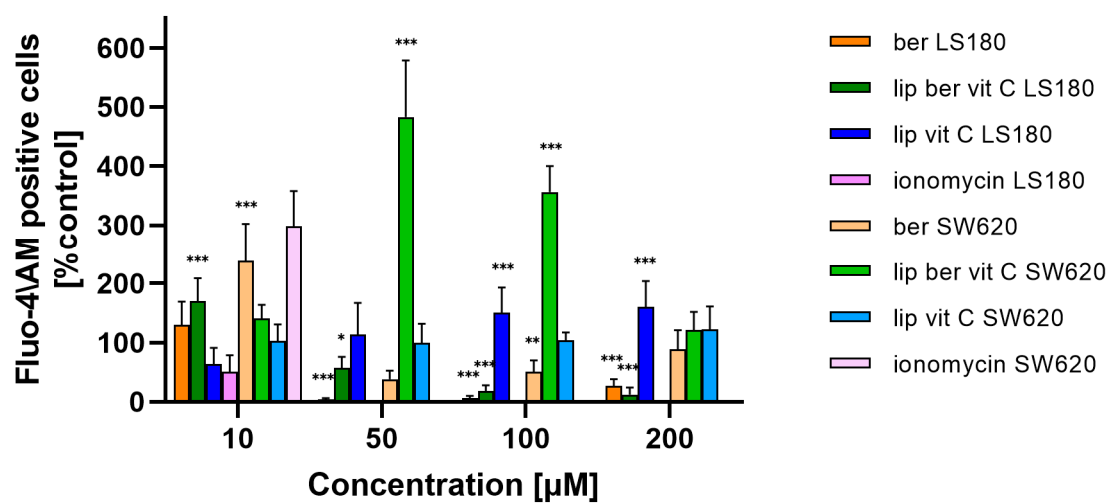

**Figure S16.** Changes in  $\text{Ca}^{2+}$  level in colon cancer cells after treatment with free berberine, blank liposomes, or berberine-loaded liposomes (10, 50, 100, or 200  $\mu\text{M}$ ) for 48 h. RFU of untreated cells (control) was considered to be 100% of the  $\text{Ca}^{2+}$  level. Data represent the mean  $\pm$  SD of four independent biological replicates. Statistical significance was determined using a one-way ANOVA (Dunnett's modification) test. \*\*\*  $p < 0.001$ ; \*\*  $p < 0.002$ ; \*  $p < 0.033$ .

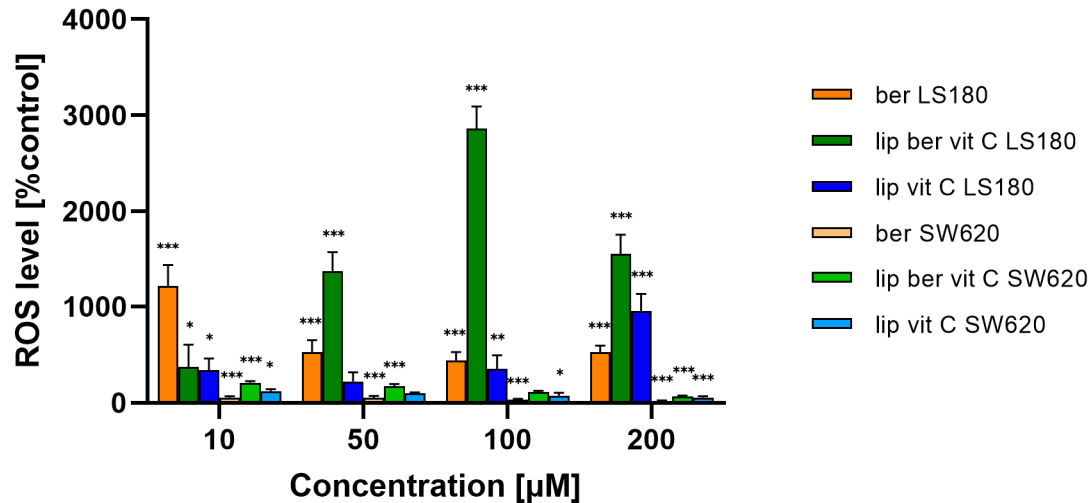

**Figure S17.** Increased ROS level in colon cancer cells after treatment with free berberine, blank liposomes, or berberine-loaded liposomes (10, 50, 100, or 200  $\mu$ M) for 48 h. Luminescence of untreated cells (control) was considered to be 100% of the ROS level. Data represent the mean  $\pm$  SD of two independent biological replicates. Statistical significance was determined using a one-way ANOVA (Dunnett's modification) test. \*\*\*  $p < 0.001$ ; \*\*  $p < 0.002$ ; \*  $p < 0.033$ .

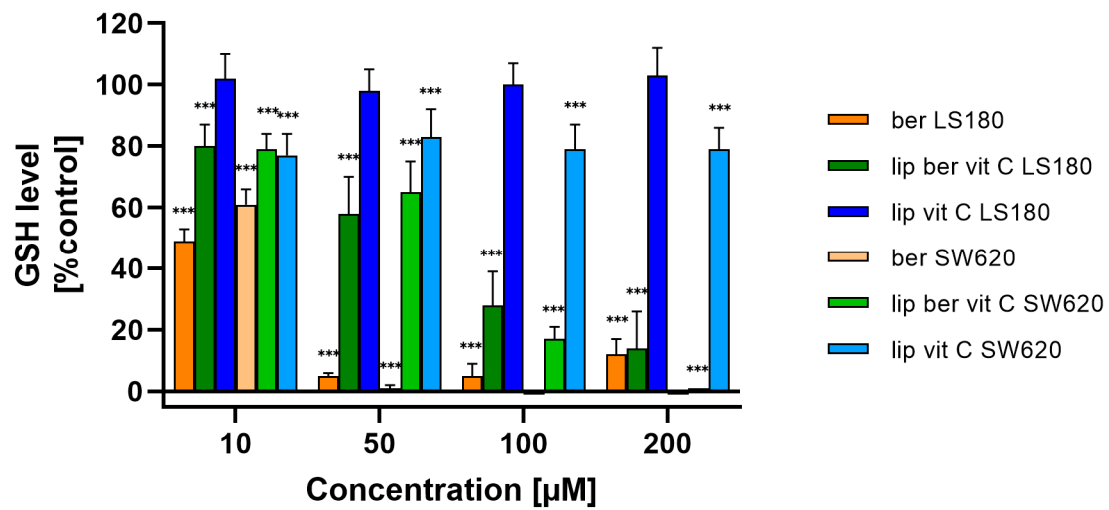

**Figure S18.** Decreased GSH level in colon cancer cells after treatment with free berberine, blank liposomes, or berberine-loaded liposomes (10, 50, 100, or 200  $\mu$ M) for 48 h. Luminescence of untreated cells (control) is considered to be 100% of the GSH level. Data represent the mean  $\pm$  SD of three independent replicates. Statistical significance was determined using a one-way ANOVA (Dunnett's modification) test. \*\*\*  $p < 0.001$ ; \*\*  $p < 0.002$ ; \*  $p < 0.033$ .

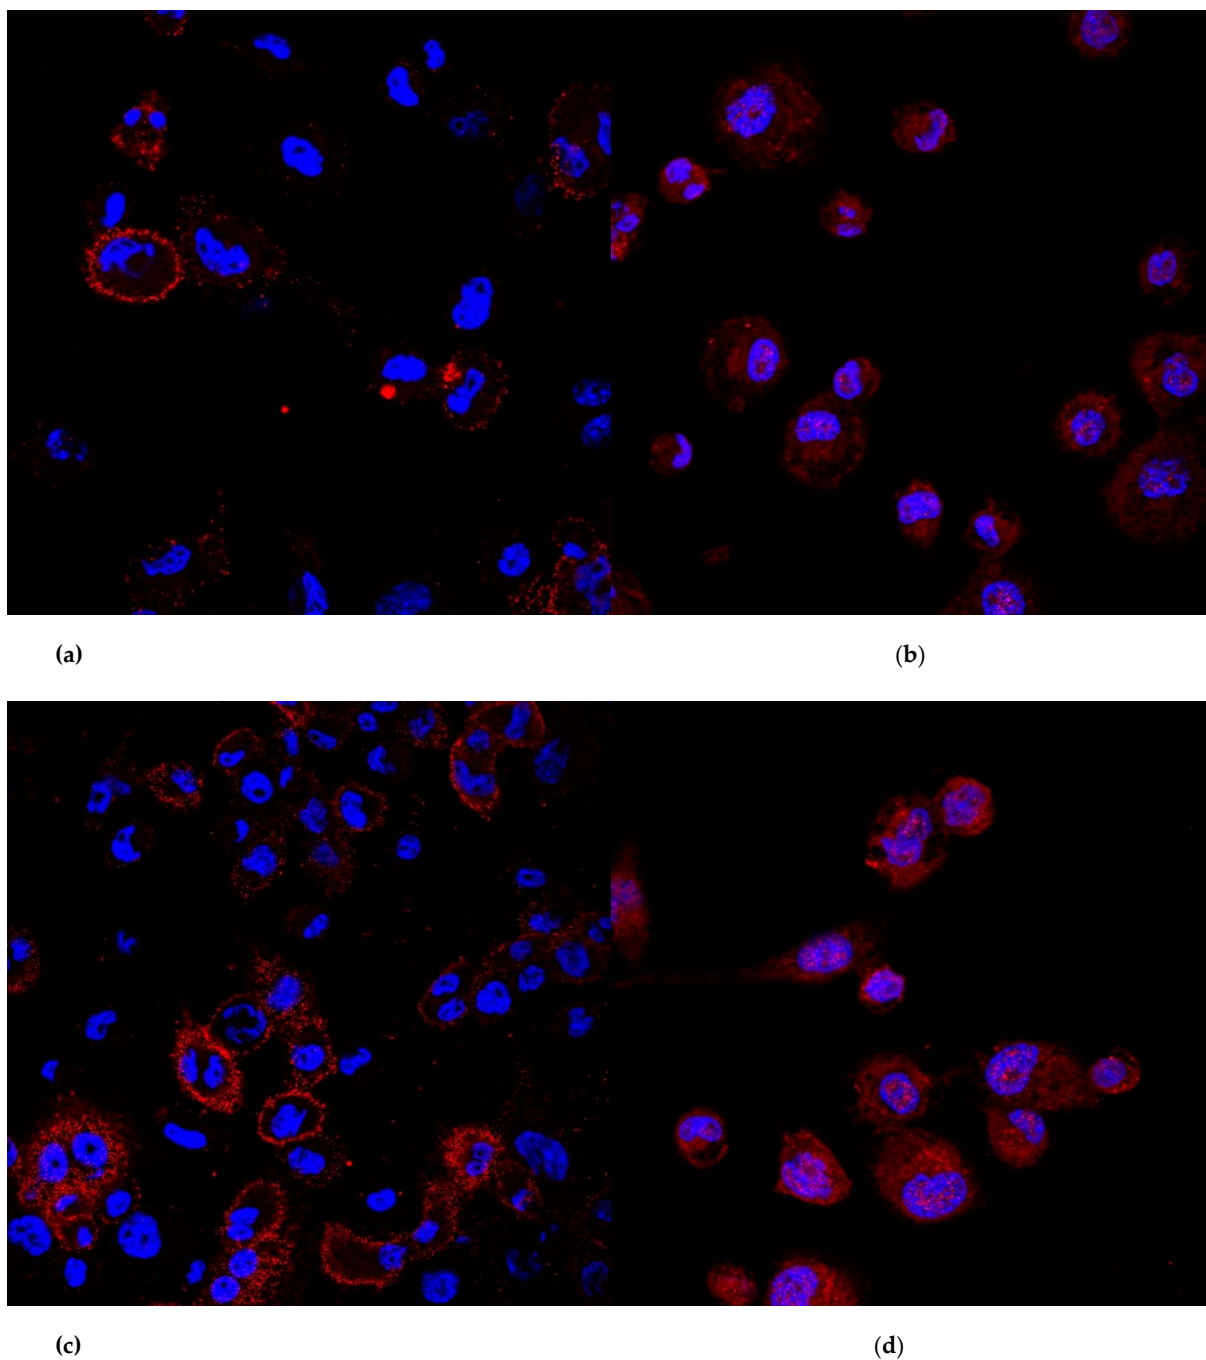

**Figure S19.** Microscopic photo of THP-1 cells (a) after treatment with 50 μM berberine-loaded liposomes with vitamin C 10 μM berberine – surface staining (b) after treatment with 50 μM berberine-loaded liposomes with vitamin C – intracellular staining (c) after treatment with 10 μM berberine – surface staining (d) after treatment with 10 μM berberine – intracellular staining. The cell nuclei were stained with DAPI and cell surface CRT bound by anti-CRT antibody recognized by Alexa Fluor 647 conjugated secondary antibody.

**Table S1.** Characterization of liposomal formulations during long term storage.

| Time | Size [nm]     | SD   | Size [nm]  | SD   | Size [nm]  | SD   |
|------|---------------|------|------------|------|------------|------|
| days | Lip ber vit C |      | Lip ber CA |      | Lip ber AS |      |
| 1    | 112           | 1,65 | 110        | 0,64 | 125        | 0,93 |
| 20   | 109           | 0,49 | 110        | 0,87 | 121        | 0,61 |
| 40   | 108           | 0,98 | 108        | 0,44 | 119        | 1,08 |
| 60   | 108           | 0,40 | 108        | 1,07 | 121        | 1,57 |
| 80   | 108           | 0,67 | 107        | 0,65 | 123        | 1,15 |
| 365  | 108           | 1,25 | 109        | 4,17 | 125        | 2,20 |

| Time | PDI           | SD    | PDI        | SD    | PDI        | SD    |
|------|---------------|-------|------------|-------|------------|-------|
| days | Lip ber vit C |       | Lip ber CA |       | Lip ber AS |       |
| 1    | 0,063         | 0,015 | 0,030      | 0,016 | 0,073      | 0,019 |
| 20   | 0,048         | 0,010 | 0,061      | 0,010 | 0,111      | 0,012 |
| 40   | 0,063         | 0,025 | 0,047      | 0,016 | 0,114      | 0,022 |
| 60   | 0,072         | 0,020 | 0,081      | 0,057 | 0,096      | 0,034 |
| 80   | 0,051         | 0,002 | 0,053      | 0,021 | 0,066      | 0,022 |
| 365  | 0,089         | 0,014 | 0,181      | 0,009 | 0,073      | 0,027 |
